# Supplementary figures and images for: Integrating NiFe bimetal sites into a conjugated microporous polymer for boosting photocatalytic selective aromatic alcohol oxidation
Source: Royal Society of Chemistry journal article supplement (doi:10.1039/d4ta04175e), 2024-01-01

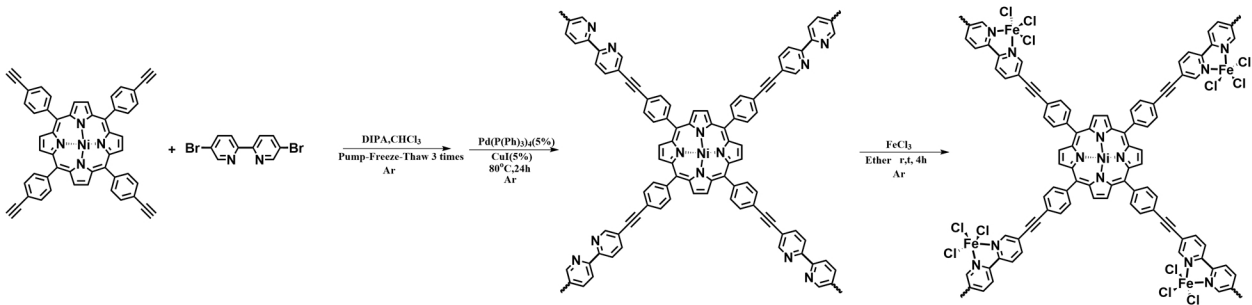

Supplement: d4ta04175e2.pdf [file d4ta04175e2.pdf]
